# Supplementary material
Source: Springer Nature journal article supplement (https://www.springermedizin.de/resource/supplementary/12883_2011_506_MOESM5_ESM.pdf/9455290)

GEL930 : Q\_0.2M NaCl fr 1+2 070925 96+96ul

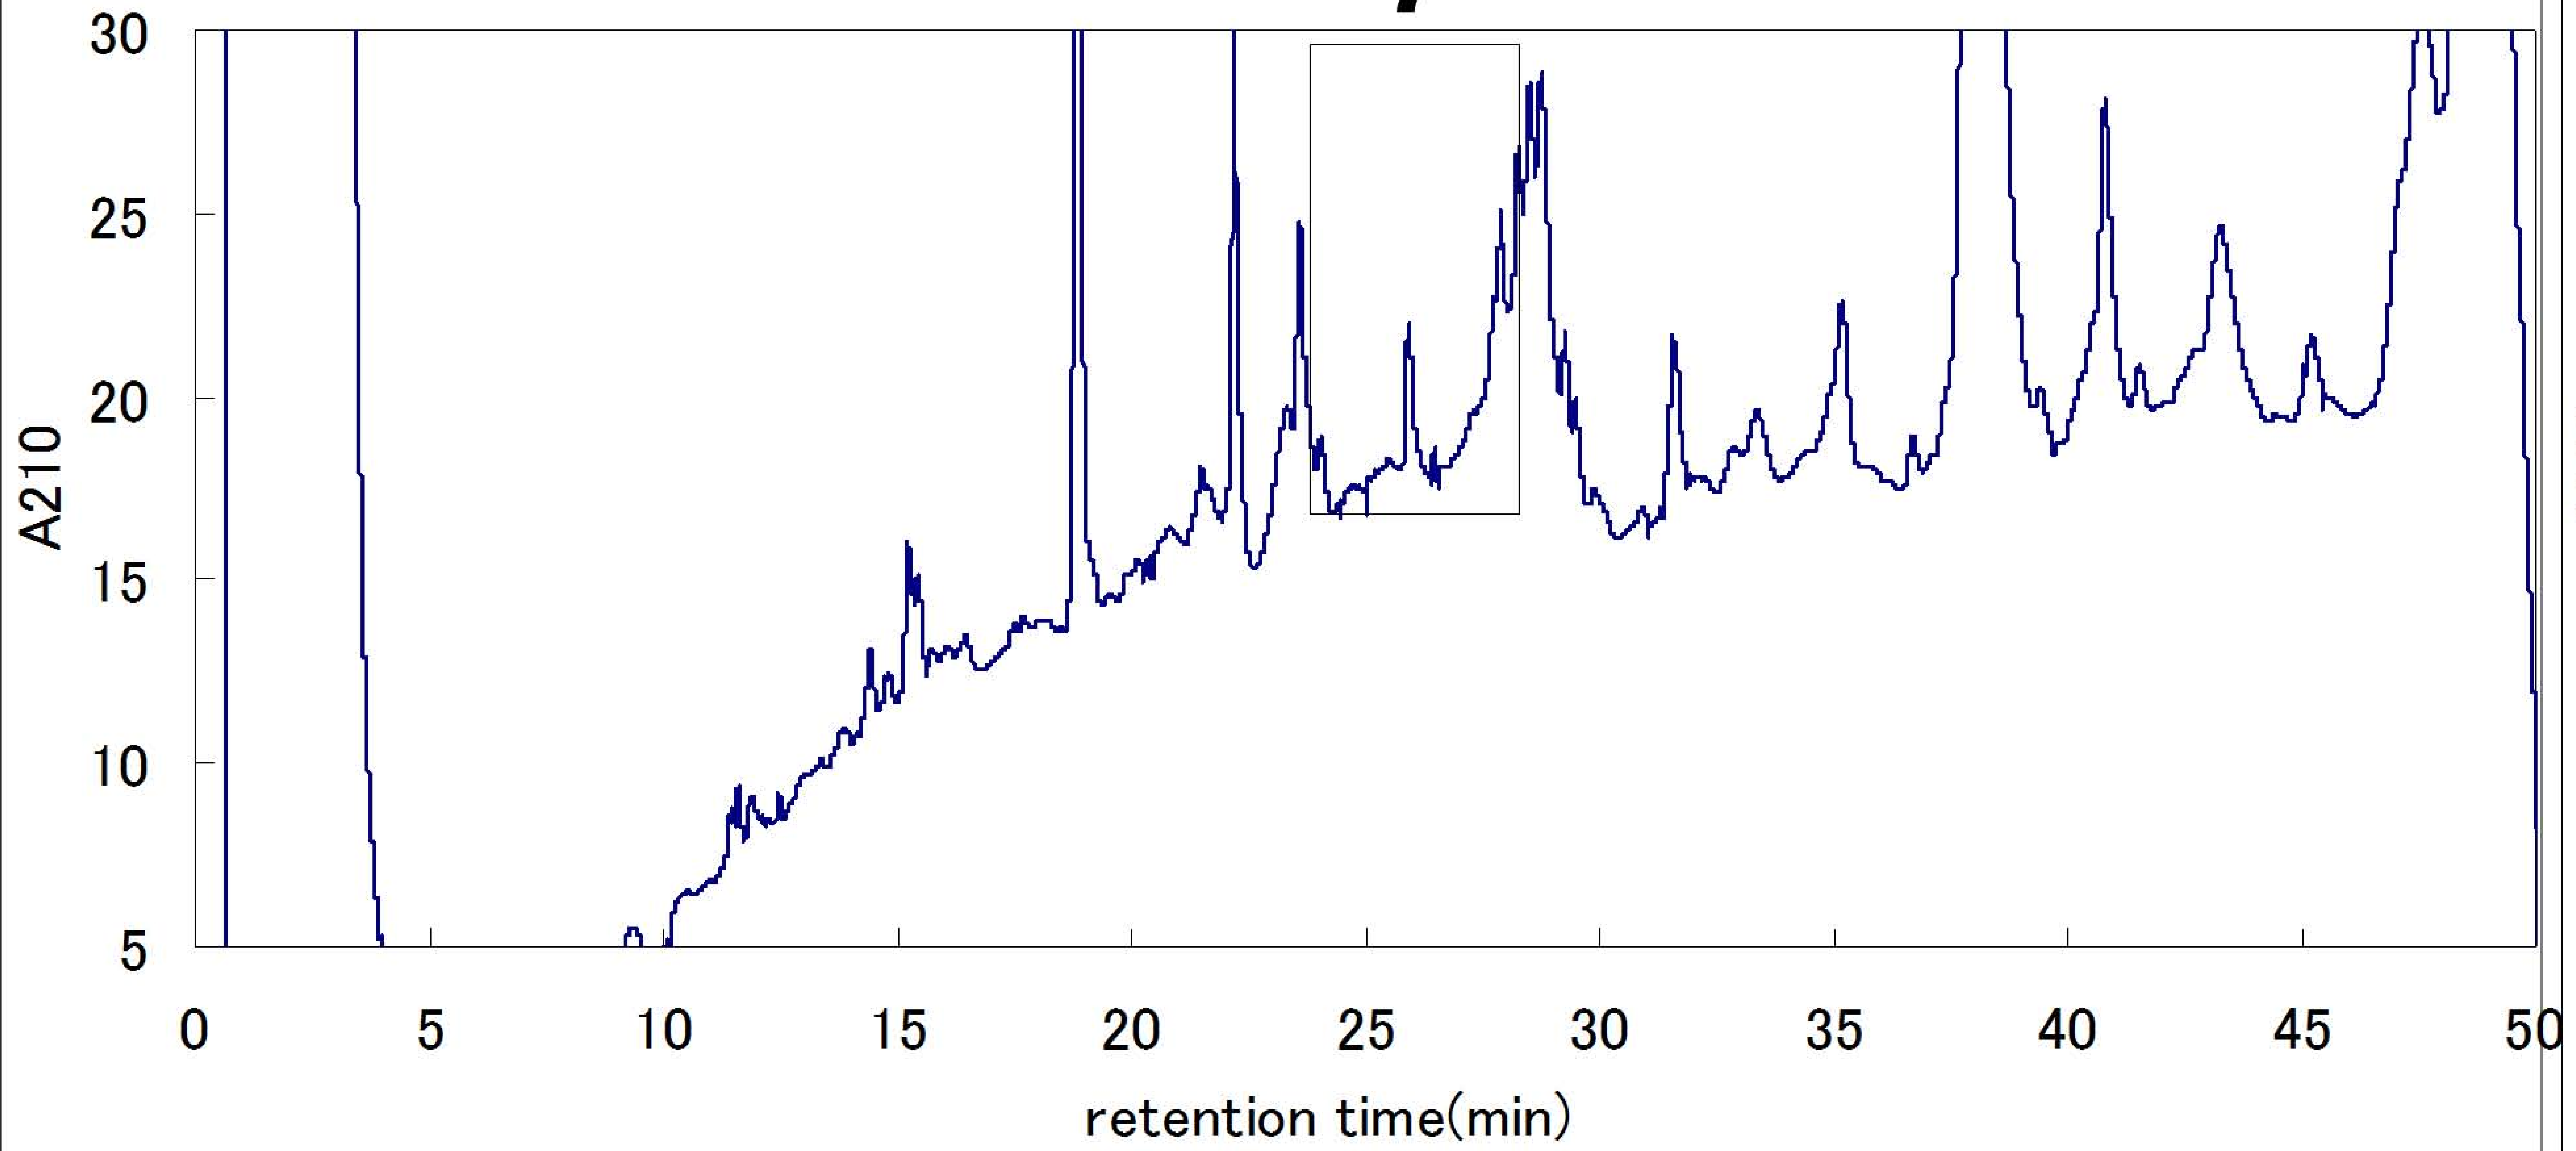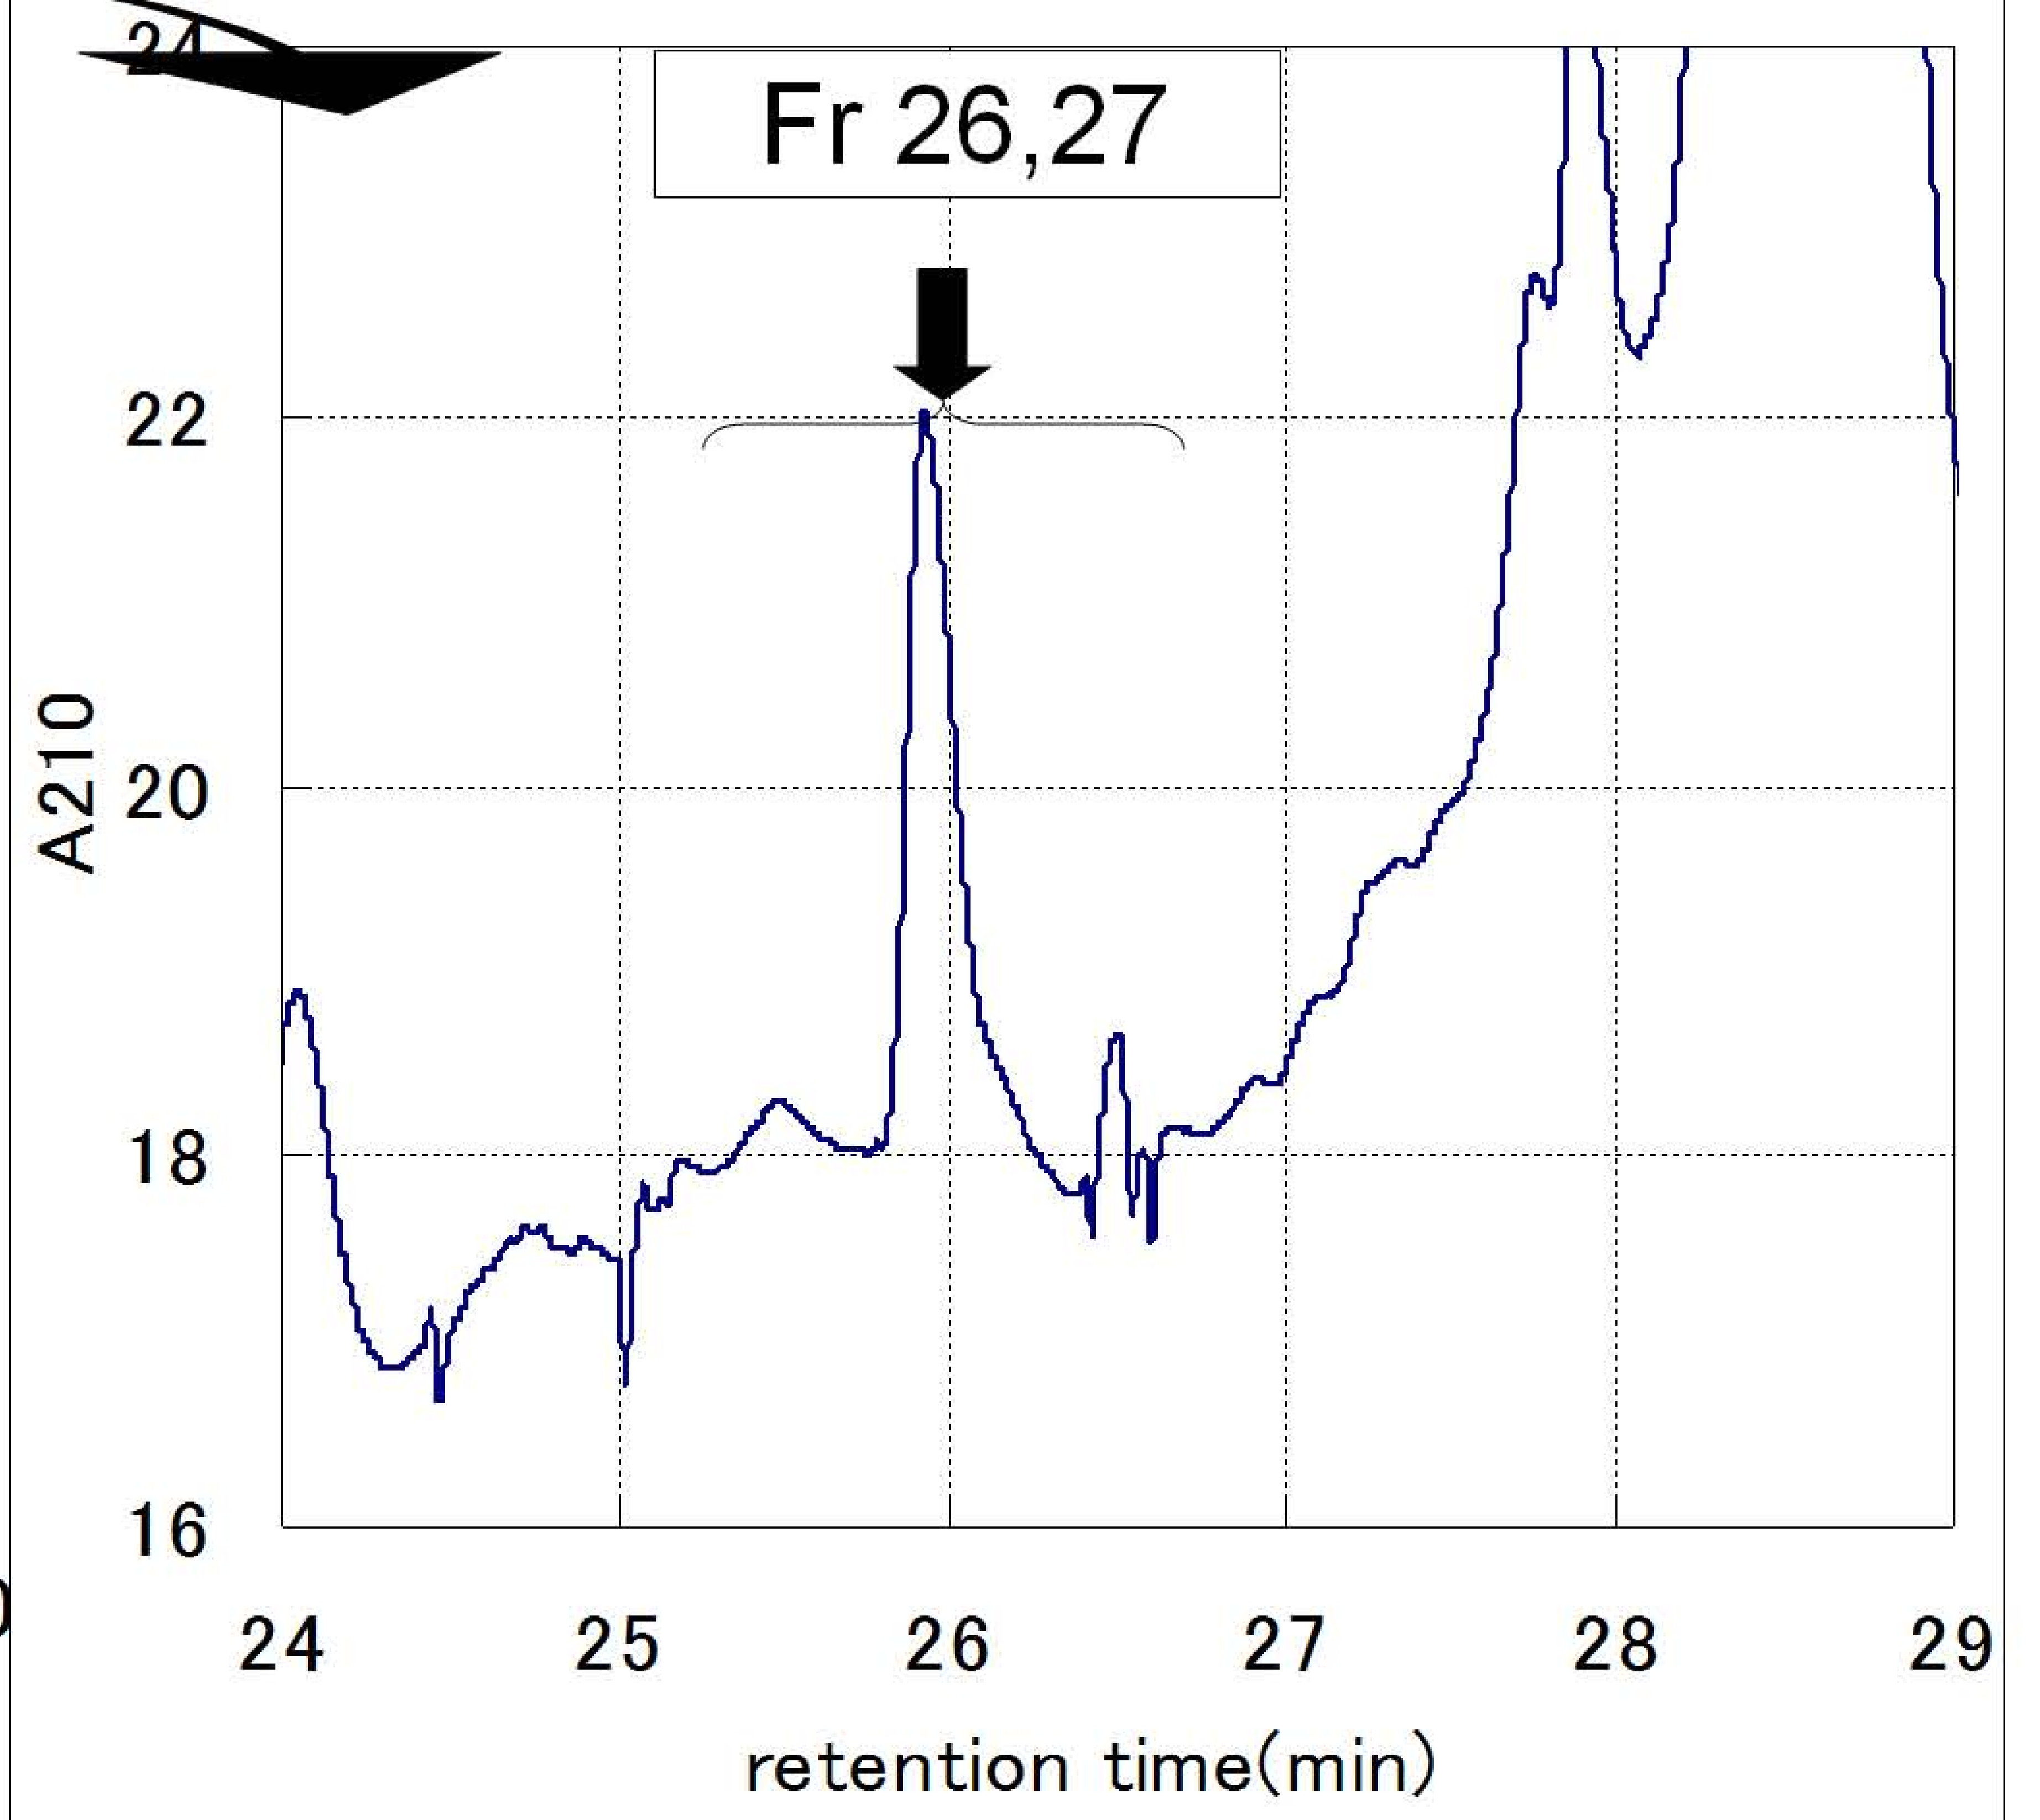

Supplement: MOESM5 [file 9455290]
